# Supplementary material for: Flavin as a photo-active acceptor for efficient energy and charge transfer in a model donor–acceptor system
Source: Royal Society of Chemistry journal article supplement (doi:10.1039/c2cp40073a), 2012-01-01
Supplement: c2cp40073a.pdf [file c2cp40073a.pdf]

## Flavin as Photo-Active Acceptor for Efficient Energy and Charge Transfer in a Model Donor-Acceptor System

Xi Yu,<sup>a,†</sup> Serkan Eymur,<sup>b,†</sup> Vijay Singh,<sup>c</sup> Boqian Yang,<sup>d</sup> Murat Tonga,<sup>a</sup> Amarnath Bheemaraju,<sup>a</sup>  
Graeme Cooke,<sup>e</sup> Chandramouleeswaran Subramani,<sup>a</sup> Dhandapani Venkataraman,<sup>a\*</sup> Robert J.  
Stanley,<sup>c\*</sup> and Vincent M. Rotello<sup>a\*</sup>

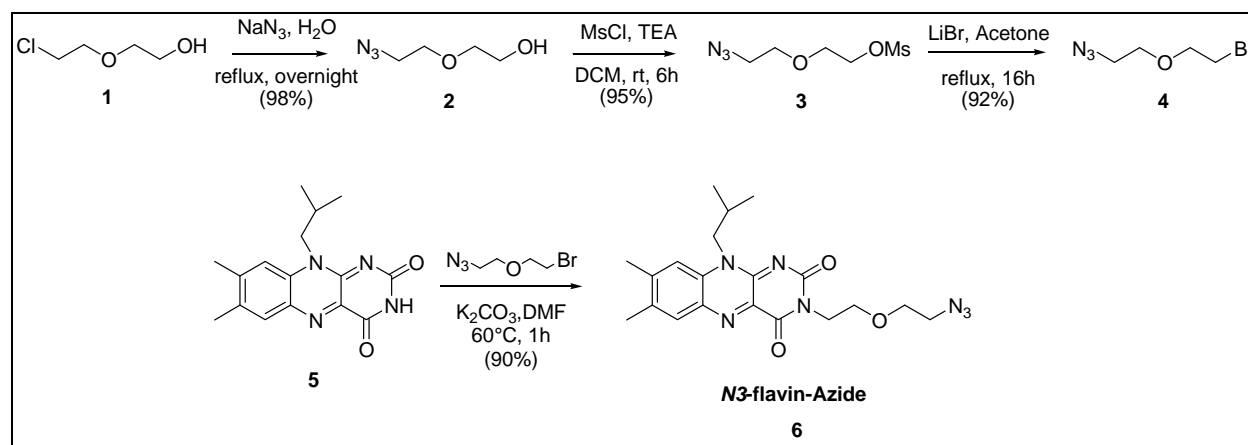

**Scheme-S1.** Synthetic scheme for the synthesis of compound **6**.

### Synthesis of compound 2:

2-(2-Chloroethoxy)ethanol **1** (40 mmol) and sodium azide (20 mmol) in 100 ml H<sub>2</sub>O were heated under reflux overnight. Upon cooling the reaction mixture was extracted with CH<sub>2</sub>Cl<sub>2</sub> (3 x 25 ml), the organic layers were combined, washed with brine, anhydrous Na<sub>2</sub>SO<sub>4</sub>, filtered, and concentrated under reduced pressure. Yield: 98%.

### Synthesis of compound 3:

To a solution of **2** (30 mmol) and Et<sub>3</sub>N (60 mmol) in dry CH<sub>2</sub>Cl<sub>2</sub> (50 ml) at 0 °C, mesityl Chloride (MsCl, 45 mmol) was added dropwise. Then, reaction was stirred at rt for 6h. The reaction mixture was washed with H<sub>2</sub>O. The aqueous phase was extracted with CH<sub>2</sub>Cl<sub>2</sub> (3 x 25 ml), and the organic layers were combined, washed with brine, anhydrous Na<sub>2</sub>SO<sub>4</sub>, filtered, and concentrated under reduced pressure. Yield: 95%.

### Synthesis of compound 4:

Compound **3** (28.5 mmol) and LiBr (84.5 mmol) are refluxed in acetone for 16 h. The reaction mixture was evaporated and washed with H<sub>2</sub>O. Aqueous phase was extracted with CH<sub>2</sub>Cl<sub>2</sub> (3 x 25 ml), the organic layers were combined, washed with brine, anhydrous Na<sub>2</sub>SO<sub>4</sub>, filtered, and concentrated under reduced pressure. Yield: 92%. <sup>1</sup>H NMR (400 MHz, CDCl<sub>3</sub>): δ 3.80 (t, J= 6.2 Hz, 2H), 3.68 (t, J= 5.0 Hz), 3.46 (t, J= 6.2 Hz, 2H), 3.39 (t, J=5.0, 2H).

### Synthesis of compound 6 (N3-Flavin-Azide):

To a solution of 7,8-dimethoxy-*N*10-isobutylisoalloxazine<sup>1</sup> **5** (1 mmol) and K<sub>2</sub>CO<sub>3</sub> (4 mmol) in DMF (5 ml) at 60 °C was added **4** (2 mmol) and the reaction was allowed to proceed overnight. Upon cooling, the reaction was quenched with H<sub>2</sub>O and extracted with CHCl<sub>3</sub> (3 x 25 ml). The organic layers were combined, washed with brine, anhydrous Na<sub>2</sub>SO<sub>4</sub>, filtered, and reduced under reverse pressure onto silica gel. The crude product was then purified using flash column chromatography yielding **6**. Yield: 90%. MS(ESI): *m/z* for calcd for C<sub>20</sub>H<sub>25</sub>N<sub>7</sub>O<sub>3</sub> [M+H]<sup>+</sup>: 412.4679, found 412.0 <sup>1</sup>H NMR (400 MHz, CDCl<sub>3</sub>): δ 8.07 (s, 1H), 7.40 (s, 1H), 4.62 (b, 2H), 4.40 (t, J=5.6 Hz, 2H), 3.89 (t, J=5.7 Hz, 2H), 3.75 (t, J=5.0 Hz, 2H), 3.35 (t, J=4.9 Hz, 2H), 2.56 (s, 3H), 2.48 (m, 1H), 2.46 (s, 3H), 1.06 (d, J=6.7 Hz, 6H).

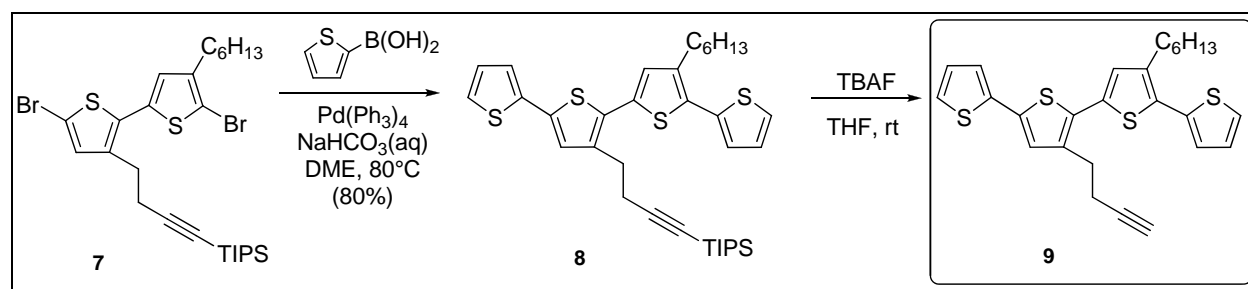

**Scheme-S2.** Synthetic scheme for the synthesis of compound **9**<sup>2</sup>.

### Synthesis of compound 9:

Suzuki coupling of **7**<sup>3</sup> with commercially available 2-thiophene boronic acid gave **8** in 70% yield. Deprotection of trisopropylsilyl group using TBAF gave **9** in 99% yield. Compound **9** was used without further purification to synthesize dyad OT4-flavin.

### Synthesis of Oligothiophene-flavin (OT4-flavin) dyad:

The dyad OT4-flavin was synthesized through the Cu(I)-catalyzed azide–alkyne cycloaddition (CuAAC) reaction<sup>4</sup> between thiophene **9** and *N*3-Flavin-azide **6**. To a round bottom flask, was added CuSO<sub>4</sub>·5H<sub>2</sub>O (0.185 mmol) and sodium ascorbate (1.0 mmol) followed by the addition of tetrahydrofuran (THF) (15 mL). To this stirred solution, water (5.0 mL) was added followed by the addition of *N*3-Flavin-azide **6** (3.7 mmol) and compound **9** (1.8 mmol). The reaction was stirred for 24 h. The reaction was quenched with water and extracted with ethyl acetate (2x25 mL). The combined organics were washed with water (2x25 mL), brine solution, dried over Na<sub>2</sub>SO<sub>4</sub>, filtered, and concentrated under reduced pressure. Purification of the residue by silica gel chromatography afforded **OT4-flavin**. Yield: 80%. <sup>1</sup>H NMR (400 MHz, CDCl<sub>3</sub>): δ 7.97 (s, 1H), 7.51 (s, 1H), 7.32 (dd, J=1.1 Hz, J= 3.9 Hz, 1H), 7.27 (s, 1H), 7.23 (dd, J=1.0 Hz, J= 4.0 Hz, 1H), 7.16 (dd, J=1.0 Hz, J= 2.5 Hz, 1H), 7.12 (dd, J=1.1 Hz, J= 2.4 Hz, 1H), 7.09-7.06 (m, 1H), 7.05-7.01 (m, 1H), 6.93 (s, 1H), 6.91 (s, 1H), 4.50 (t, J= 4.8 Hz, 2H), 4.48 (b, 2H), 4.34 (t, J= 5.2 Hz, 2H), 3.82 (t, J= 4.9 Hz, 2H), 3.78 (t, J= 5.2 Hz, 2H), 3.08-2.98 (m, 2H), 2.97-2.87 (m, 2H), 2.73 (t, J= 7.9 Hz, 2H), 2.47 (s, 3H), 2.42-2.34 (m, 1H), 2.33 (s, 3H), 1.74-1.56 (m, 2H), 1.44-1.24 (m,

6H), 0.98 (d,  $J = 6.7$  Hz, 6H), 0.89 (t,  $J = 6.9$  Hz, 3H). MS(ESI):  $m/z$  for calcd for  $C_{46}H_{51}N_7O_3S_4 [M+H]^+$ : 901.1898, found 900.6130.  $^{13}C$  NMR ( $CDCl_3$ , ppm):  $\delta$  160.1, 155.6, 149.4, 149.3, 146.6, 140.0, 138.6, 138.4, 137.5, 137.1, 137.1, 137.0, 136.9, 136.6, 135.0, 131.2, 129.2, 128.3, 127.2, 127.1, 126.8, 126.7, 126.6, 125.1, 125.6, 124.5, 121.5, 114.9, 69.1, 68.4, 50.3 50.2, 41.0, 34.8, 32.6, 29.3, 29.1, 28.1, 26.9, 25.1 22.7, 20.7, 19.4, 14.6.

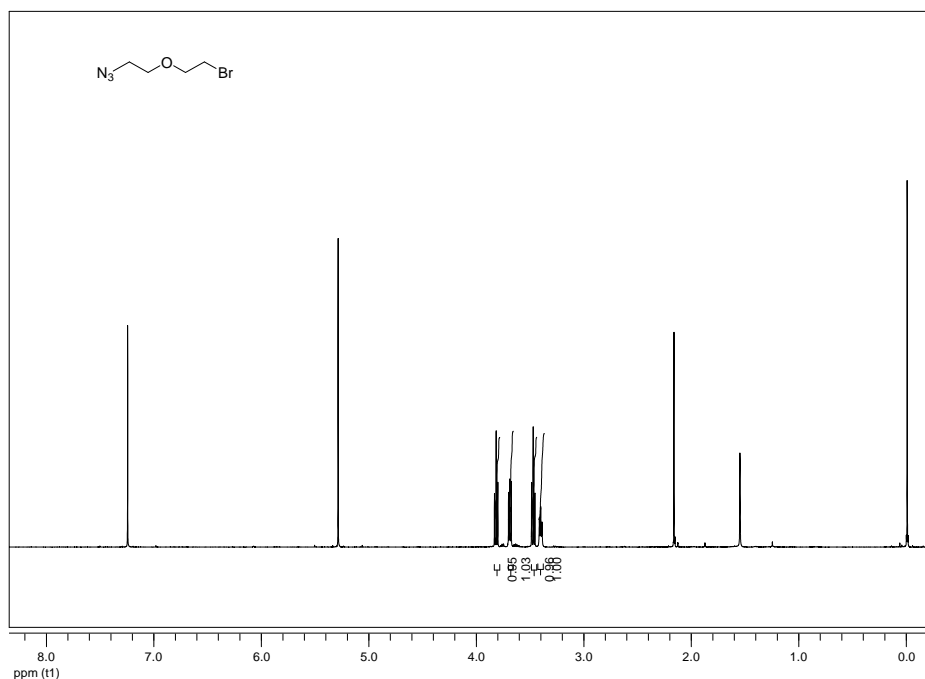

**Figure S1.**  $^1H$  NMR spectrum of compound **4**

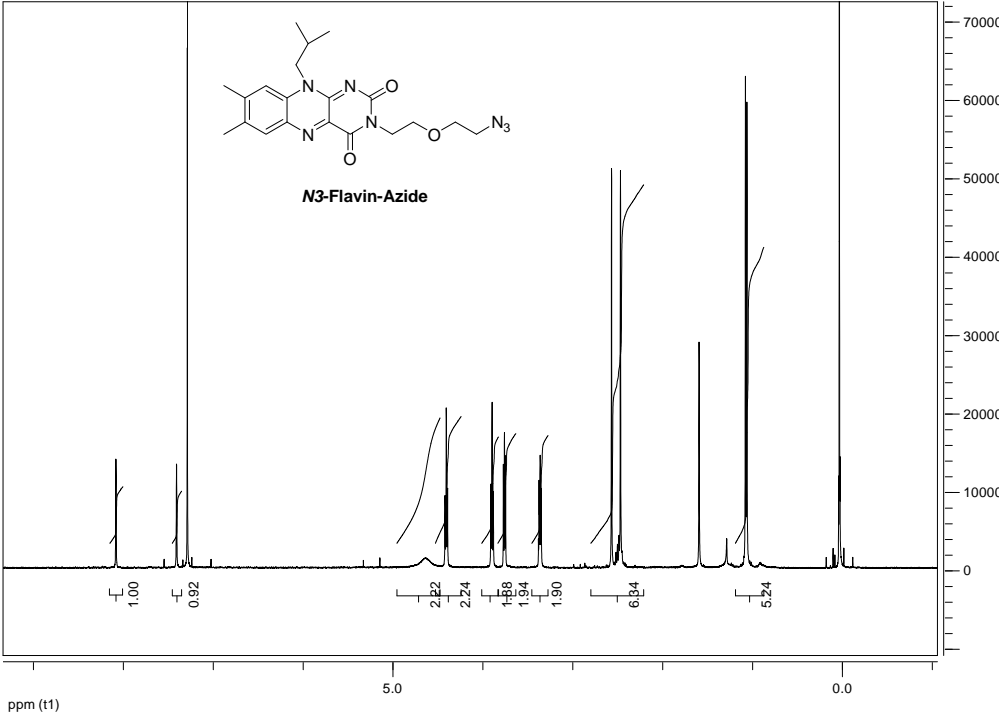

**Figure S2.** <sup>1</sup>H NMR spectrum of compound 6

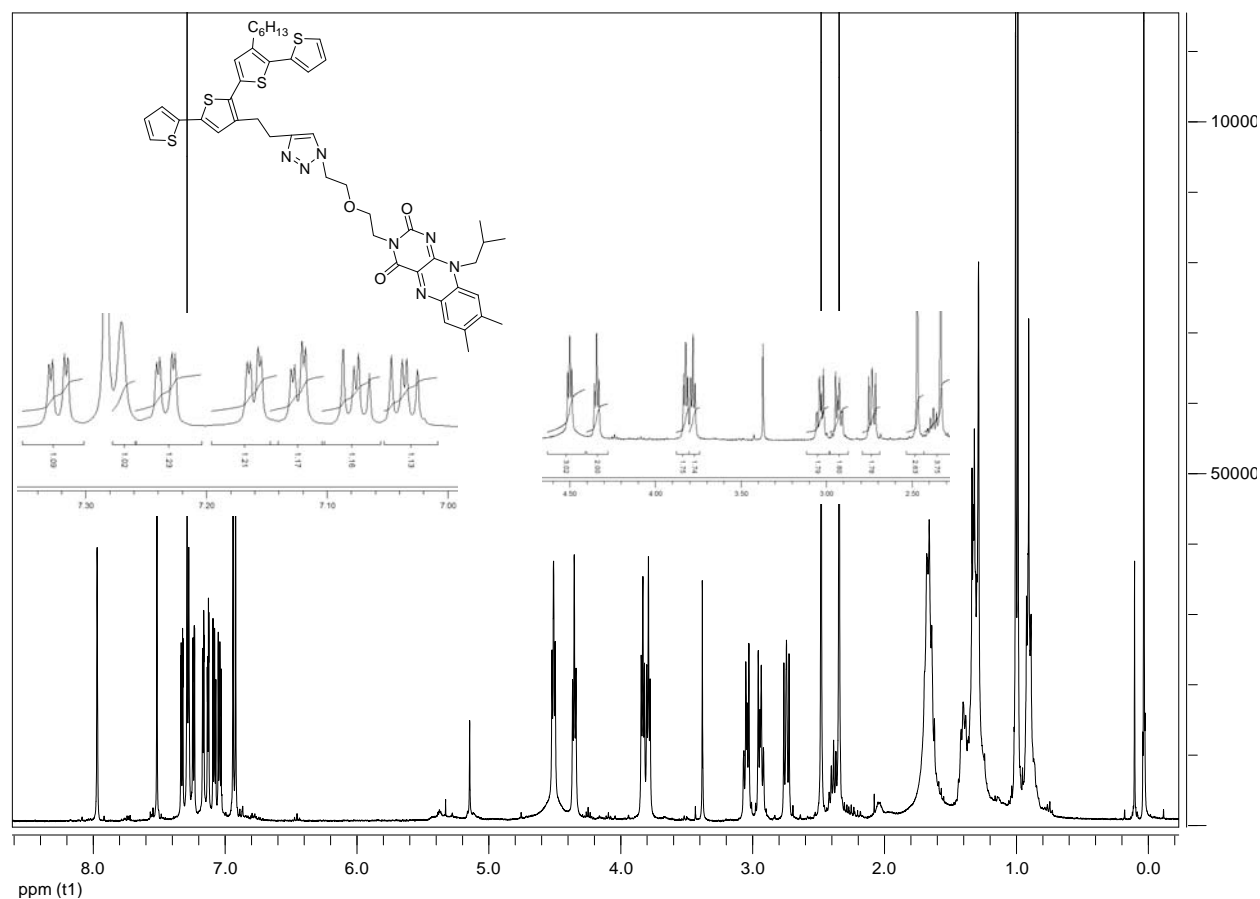

**Figure S3.**  $^1\text{H}$  NMR spectrum of dyad OT4-flavin

## References:

1. Y-M. Legrand, M. Gray, G. Cooke, V. M. Rotello, *J. Am. Chem. Soc.* 2003, **125**, 15789–15795.
2. A. Bheemaraju, M. Pourmand, B. Yang, S. K. Surampudi, T. L. Benanti, M. Achermann, M. D. Barnes, D. Venkataraman, *J. Macromol. Sci. A* 2011, **48**, 986–993.
3. T. L. Benanti, A. Kalaydjian, D. Venkataraman, *Macromolecules* 2008, **41**, 8312–8315.
4. H. C. Kolb, M. G. Finn, K. B. Sharpless, *Angew. Chem. Int. Ed.* 2001, **40**, 2004–2021.
